# Supplementary material for: Leptin administration does not influence migratory behaviour in white-throated sparrows (Zonotrichia albicollis)
Source: PeerJ. 2022 Jun 15;10:e13584. doi: 10.7717/peerj.13584 (PMC9206435; doi:10.7717/peerj.13584)
Supplement: Supplemental Information 1 — All migratory restlessness behaviour for each bird for each night of the experiment. There was no difference in migratory behaviour between birds that received injections of saline or leptin. [file peerj-10-13584-s001.xlsx]

## Sheet: Nocturnal Restlessness
Date	Trial	Phase	Bird_ID	Treatment	Sex	Morph	Velocity_total_cms	Distance_total_cm	Movement_s	Mobile_s
2019-01-29	1	Injection	86518	Leptin	1	1	8023.22	5354.06	224.887	2320.27
2019-01-29	1	Injection	86512	Saline	1	1	5742	3831.75	155.486	2142.1
2019-01-29	1	Injection	86601	Leptin	1	2	113354	75643.2	13053.4	14839.2
2019-01-29	1	Injection	86510	Saline	2	1	18410.6	12285.8	1420.06	4653.22
2019-01-29	1	Injection	86604	Leptin	2	1	6069.66	4050.41	51.3836	1456.76
2019-01-29	1	Injection	86613	Saline	1	2	7042.8	4699.8	159.489	5685.57
2019-01-29	1	Injection	86516	Leptin	2	1	151120	100845	15936.3	16199.2
2019-01-29	1	Injection	86690	Saline	1	2	121286	80936.8	13381.8	16014.3
2019-01-29	1	Injection	86611	Leptin	1	2	35518.4	23702.2	4158.74	7488
2019-01-29	1	Injection	86602	Saline	1	2	54698.7	36501.6	6124.66	11365.8
2019-01-29	1	Injection	86503	Leptin	1	2	3744.99	2499.11	36.7026	119.45
2019-01-29	1	Injection	86292	Saline	2	2	75302.1	50250.6	8585.74	10164.6
2019-01-29	1	Injection	86515	Saline	2	2	52614.3	35110.6	6005.21	16720.4
2019-01-29	1	Injection	88000	Leptin	2	1	36203.1	24159	2266.89	8182.68
2019-01-29	1	Injection	86519	Saline	1	1	14765.1	9853.07	1090.4	2312.93
2019-01-29	1	Injection	86612	Leptin	2	1	7971.07	5319.25	436.427	3550.81
2019-01-29	1	Injection	86508	Saline	1	1	3983.3	2658.14	137.468	653.306
2019-01-29	1	Injection	86513	Leptin	1	1	15562	10384.8	541.197	6356.22
2019-01-29	1	Injection	86605	Saline	2	1	20445	13643.3	2186.14	7238.42
2019-01-29	1	Injection	86610	Leptin	1	2	43576.9	29079.7	4258.17	7291.14
2019-01-29	1	Injection	88163	Saline	2	1	43633.3	29117.4	3574.83	9017.5
2019-01-29	1	Injection	86517	Leptin	2	1	111861	74647.1	9199.67	8407.56
2019-01-29	1	Injection	86504	Saline	2	2	2307.15	1539.61	51.3836	15.3484
2019-01-29	1	Injection	86603	Leptin	2	1	5653.36	3772.6	203.533	2507.12
2019-01-30	2	Injection	86518	Leptin	1	1	5591.75	3731.49	80.7457	3545.47
2019-01-30	2	Injection	86512	Saline	1	1	2020.88	1348.58	20.6869	216.879
2019-01-30	2	Injection	86601	Leptin	1	2	75144.7	50145.6	7238.42	18322.6
2019-01-30	2	Injection	86510	Saline	2	1	23127.8	15433.6	1474.11	1915.88
2019-01-30	2	Injection	86604	Leptin	2	1	9231.33	6160.25	102.767	7652.83
2019-01-30	2	Injection	86613	Saline	1	2	18304.2	12214.8	1753.72	2069.36
2019-01-30	2	Injection	86516	Leptin	2	1	153122	102182	14964	13624
2019-01-30	2	Injection	86690	Saline	1	2	72046.4	48078	5821.03	11818.9
2019-01-30	2	Injection	86611	Leptin	1	2	25598.3	17082.3	1492.79	4419.66
2019-01-30	2	Injection	86602	Saline	1	2	112557	75111.4	9050.86	11937
2019-01-30	2	Injection	86503	Leptin	1	2	7056.06	4708.65	313.64	3133.07
2019-01-30	2	Injection	86292	Saline	2	2	83749.2	55887.5	7977.81	10124.6
2019-01-30	2	Injection	86515	Saline	2	2	79553.2	53087.4	6573.77	16360.7
2019-01-30	2	Injection	88000	Leptin	2	1	7902.58	5273.55	256.918	5732.95
2019-01-30	2	Injection	86519	Saline	1	1	8940.63	5966.26	468.459	2009.3
2019-01-30	2	Injection	86612	Leptin	2	1	6366.4	4248.43	179.509	2980.25
2019-01-30	2	Injection	86508	Saline	1	1	6377.93	4256.12	399.057	346.339
2019-01-30	2	Injection	86513	Leptin	1	1	7052.09	4706	96.0941	1496.13
2019-01-30	2	Injection	86605	Saline	2	1	6780.95	4525.07	60.0588	6733.26
2019-01-30	2	Injection	86610	Leptin	1	2	66001.7	44044.3	6455.65	7578.75
2019-01-30	2	Injection	88163	Saline	2	1	15541.3	10371	898.88	2966.9
2019-01-30	2	Injection	86517	Leptin	2	1	42837.3	28586.2	4928.83	3996.58
2019-01-30	2	Injection	86504	Saline	2	2	32641.9	21782.6	958.272	24774.9
2019-01-30	2	Injection	86603	Leptin	2	1	10961.9	7315.13	862.177	1224.53
2019-01-31	3	Injection	86518	Leptin	1	1	5558.85	3709.53	14.0137	3757.01
2019-01-31	3	Injection	86512	Saline	1	1	4531.35	3023.86	189.519	1224.53
2019-01-31	3	Injection	86601	Leptin	1	2	50166.2	33476.9	3977.23	11786.2
2019-01-31	3	Injection	86510	Saline	2	1	34001.1	22689.6	2098.05	1694.33
2019-01-31	3	Injection	86604	Leptin	2	1	18230.5	12165.6	1739.04	8331.49
2019-01-31	3	Injection	86613	Saline	1	2	15411.8	10284.6	1187.16	3266.53
2019-01-31	3	Injection	86516	Leptin	2	1	210339	140364	14623	19762.7
2019-01-31	3	Injection	86690	Saline	1	2	116617	77820.6	11596.7	13263.7
2019-01-31	3	Injection	86611	Leptin	1	2	54895	36632.5	4928.83	6696.56
2019-01-31	3	Injection	86602	Saline	1	2	78381.5	52305.5	9164.97	14970
2019-01-31	3	Injection	86503	Leptin	1	2	37533.7	25047	2395.01	10397.5
2019-01-31	3	Injection	86292	Saline	2	2	31803.8	21223.3	1592.23	11153.6
2019-01-31	3	Injection	86515	Saline	2	2	48283.8	32220.7	4086	17204.2
2019-01-31	3	Injection	88000	Leptin	2	1	17127.8	11429.7	834.817	9521.99
2019-01-31	3	Injection	86519	Saline	1	1	54856.9	36607.1	4284.19	4426.33
2019-01-31	3	Injection	86612	Leptin	2	1	9651.3	6440.51	459.116	3428.02
2019-01-31	3	Injection	86508	Saline	1	1	15079	10062.5	567.889	14568.9
2019-01-31	3	Injection	86513	Leptin	1	1	69689	46504.9	8393.55	10769.2
2019-01-31	3	Injection	86605	Saline	2	1	5038.8	3362.49	178.842	481.805
2019-01-31	3	Injection	86610	Leptin	1	2	146368	97674.3	10098.6	11386.5
2019-01-31	3	Injection	88163	Saline	2	1	9017.21	6017.37	249.578	1927.89
2019-01-31	3	Injection	86517	Leptin	2	1	28084.2	18741.2	1745.04	6783.31
2019-01-31	3	Injection	86504	Saline	2	2	2269.57	1514.53	44.0431	56.0549
2019-01-31	3	Injection	86603	Leptin	2	1	17387.8	11603.2	1479.45	2918.86
2019-02-01	4	Injection	86518	Leptin	1	1	12726.9	8492.9	926.24	4124.7
2019-02-01	4	Injection	86512	Saline	1	1	7286.75	4862.59	637.291	1483.45
2019-02-01	4	Injection	86601	Leptin	1	2	189714	126600	15306.3	12844.6
2019-02-01	4	Injection	86510	Saline	2	1	99924.9	66681.9	7082.27	6893.42
2019-02-01	4	Injection	86604	Leptin	2	1	20538.7	13705.9	2417.7	8121.28
2019-02-01	4	Injection	86613	Saline	1	2	37973.2	25340.3	3202.47	5514.07
2019-02-01	4	Injection	86516	Leptin	2	1	109022	72752.6	9376.51	16782.4
2019-02-01	4	Injection	86690	Saline	1	2	153157	102205	12136.5	14118.5
2019-02-01	4	Injection	86611	Leptin	1	2	57148.5	38136.3	5070.96	10197.3
2019-02-01	4	Injection	86602	Saline	1	2	89760.3	59898.8	9645.44	15279
2019-02-01	4	Injection	86503	Leptin	1	2	40533.3	27048.7	3733.66	9026.17
2019-02-01	4	Injection	86292	Saline	2	2	115255	76912.1	11096.2	12245.3
2019-02-01	4	Injection	86515	Saline	2	2	86391.6	57650.8	10667.1	18175.1
2019-02-01	4	Injection	88000	Leptin	2	1	5347.44	3568.45	0	653.306
2019-02-01	4	Injection	86519	Saline	1	1	133494	89083.2	7136.99	6151.36
2019-02-01	4	Injection	86612	Leptin	2	1	10136.9	6764.58	488.478	5046.27
2019-02-01	4	Injection	86508	Saline	1	1	138189	92216	9804.27	15836.2
2019-02-01	4	Injection	86513	Leptin	1	1	57396.1	38301.5	4338.25	7694.87
2019-02-01	4	Injection	86605	Saline	2	1	10659.6	7113.4	22.6889	12769.8
2019-02-01	4	Injection	86610	Leptin	1	2	178423	119065	10588.4	16314
2019-02-01	4	Injection	88163	Saline	2	1	19947.9	13311.6	924.238	4793.36
2019-02-01	4	Injection	86517	Leptin	2	1	64455.8	43012.7	8310.14	7983.82
2019-02-01	4	Injection	86504	Saline	2	2	2875.16	1918.65	8.00784	351.01
2019-02-01	4	Injection	86603	Leptin	2	1	21249.4	14180.2	1101.75	14308.7
2019-02-02	5	Injection	86518	Leptin	1	1	20298.5	13545.6	1773.07	2740.02
2019-02-02	5	Injection	86512	Saline	1	1	6480.42	4324.51	97.4287	4007.26
2019-02-02	5	Injection	86601	Leptin	1	2	93706.7	62532.4	7717.56	12450.9
2019-02-02	5	Injection	86510	Saline	2	1	97739.4	65223.4	9342.48	8066.56
2019-02-02	5	Injection	86604	Leptin	2	1	74704	49851.5	8593.08	21119.3
2019-02-02	5	Injection	86613	Saline	1	2	56817.3	37915.3	4852.75	6745.94
2019-02-02	5	Injection	86516	Leptin	2	1	206550	137835	23695.9	20917.1
2019-02-02	5	Injection	86690	Saline	1	2	126995	84746	8678.5	12278
2019-02-02	5	Injection	86611	Leptin	1	2	66752.6	44545.3	5660.21	9574.71
2019-02-02	5	Injection	86602	Saline	1	2	79421.7	52999.7	8109.94	10833.3
2019-02-02	5	Injection	86503	Leptin	1	2	25148.9	16782.3	2001.29	8093.92
2019-02-02	5	Injection	86292	Saline	2	2	120606	80482.5	11917.7	14405.4
2019-02-02	5	Injection	86515	Saline	2	2	59257.3	39543.6	6358.22	14923.9
2019-02-02	5	Injection	88000	Leptin	2	1	6109.03	4076.68	290.284	1642.94
2019-02-02	5	Injection	86519	Saline	1	1	86558.5	57762.2	7027.55	7211.06
2019-02-02	5	Injection	86612	Leptin	2	1	9786.01	6530.4	444.435	4122.04
2019-02-02	5	Injection	86508	Saline	1	1	112243	74901.9	9158.97	7486.66
2019-02-02	5	Injection	86513	Leptin	1	1	58217.1	38849.4	4332.24	9967.76
2019-02-02	5	Injection	86605	Saline	2	1	10298.2	6872.2	746.064	2183.47
2019-02-02	5	Injection	86610	Leptin	1	2	120570	80458.6	10946.7	12047.8
2019-02-02	5	Injection	88163	Saline	2	1	4368.36	2915.09	15.3484	966.947
2019-02-02	5	Injection	86517	Leptin	2	1	57363	38279.5	6695.22	8477.63
2019-02-02	5	Injection	86504	Saline	2	2	5819.19	3883.26	4.00392	1416.72
2019-02-02	5	Injection	86603	Leptin	2	1	16692.2	11139	1378.68	1572.21
2019-02-03	6	Injection	86518	Leptin	1	1	5228.78	3489.27	0	960.941
2019-02-03	6	Injection	86512	Saline	1	1	4220.31	2816.3	215.544	1680.98
2019-02-03	6	Injection	86601	Leptin	1	2	80397.1	53650.6	7183.03	13066.8
2019-02-03	6	Injection	86510	Saline	2	1	36503.9	24359.8	2211.5	3562.82
2019-02-03	6	Injection	86604	Leptin	2	1	58061	38745.3	6210.75	17173.5
2019-02-03	6	Injection	86613	Saline	1	2	23600.4	15749	1954.58	3180.45
2019-02-03	6	Injection	86516	Leptin	2	1	140362	93666.7	14469.5	16869.2
2019-02-03	6	Injection	86690	Saline	1	2	19468.6	12991.8	1835.13	3275.87
2019-02-03	6	Injection	86611	Leptin	1	2	77841.4	51945.1	6478.34	10710.5
2019-02-03	6	Injection	86602	Saline	1	2	68349.4	45610.9	8166.66	13483.2
2019-02-03	6	Injection	86503	Leptin	1	2	31469	20999.9	2421.04	6685.88
2019-02-03	6	Injection	86292	Saline	2	2	90878.7	60645.1	7439.28	10175.3
2019-02-03	6	Injection	86515	Saline	2	2	103089	68793.1	9640.1	13796.8
2019-02-03	6	Injection	88000	Leptin	2	1	32920.9	21968.8	4256.17	5590.14
2019-02-03	6	Injection	86519	Saline	1	1	78308.5	52256.8	5789.67	6025.23
2019-02-03	6	Injection	86612	Leptin	2	1	8119.11	5418.04	134.131	7299.15
2019-02-03	6	Injection	86508	Saline	1	1	148914	99373.4	13824.9	19985.6
2019-02-03	6	Injection	86513	Leptin	1	1	79511.9	53059.9	6296.83	17897.5
2019-02-03	6	Injection	86605	Saline	2	1	7323.56	4887.16	105.437	954.268
2019-02-03	6	Injection	86610	Leptin	1	2	92689.6	61853.7	8118.62	6251.45
2019-02-03	6	Injection	88163	Saline	2	1	5969.15	3983.34	71.4032	1993.28
2019-02-03	6	Injection	86517	Leptin	2	1	58029.6	38724.3	6194.73	6351.55
2019-02-03	6	Injection	86504	Saline	2	2	4298.69	2868.6	202.865	252.914
2019-02-03	6	Injection	86603	Leptin	2	1	11672.6	7789.35	525.181	2387.67
2019-02-04	7	Injection	86518	Leptin	1	1	2845.17	1898.64	1.33464	1081.06
2019-02-04	7	Injection	86512	Saline	1	1	5155.53	3440.39	85.417	3863.12
2019-02-04	7	Injection	86601	Leptin	1	2	29968	19998.3	2914.19	10180.6
2019-02-04	7	Injection	86510	Saline	2	1	86795.1	57920.1	8815.96	8747.9
2019-02-04	7	Injection	86604	Leptin	2	1	37796.8	25222.5	4667.9	15471.1
2019-02-04	7	Injection	86613	Saline	1	2	4564.06	3045.69	272.267	613.267
2019-02-04	7	Injection	86516	Leptin	2	1	162679	108559	20964.5	22271.1
2019-02-04	7	Injection	86690	Saline	1	2	12582.2	8396.36	1426.06	2254.87
2019-02-04	7	Injection	86611	Leptin	1	2	64009.6	42714.9	6242.78	9544.68
2019-02-04	7	Injection	86602	Saline	1	2	63567.7	42420	8244.74	13690.7
2019-02-04	7	Injection	86503	Leptin	1	2	39754.1	26528.7	4653.89	7335.85
2019-02-04	7	Injection	86292	Saline	2	2	117863	78652.5	12492.2	15119.5
2019-02-04	7	Injection	86515	Saline	2	2	64556.5	43079.9	7087.61	15268.3
2019-02-04	7	Injection	88000	Leptin	2	1	5715.39	3814	260.255	1584.22
2019-02-04	7	Injection	86519	Saline	1	1	57759	38543.7	3696.95	6750.61
2019-02-04	7	Injection	86612	Leptin	2	1	8498.19	5671.01	170.834	2986.26
2019-02-04	7	Injection	86508	Saline	1	1	148810	99303.9	16261.3	13749.5
2019-02-04	7	Injection	86513	Leptin	1	1	101868	67978.7	11094.2	13176.9
2019-02-04	7	Injection	86610	Leptin	1	2	144904	96697.1	12124.5	11528.6
2019-02-04	7	Injection	88163	Saline	2	1	4079.88	2722.58	36.7026	553.876
2019-02-04	7	Injection	86517	Leptin	2	1	53282.5	35556.5	6370.9	6642.5
2019-02-04	7	Injection	86504	Saline	2	2	3696.08	2466.47	30.0294	576.564
2019-02-04	7	Injection	86603	Leptin	2	1	4699.58	3136.12	219.548	578.566
2019-02-05	8	Injection	86518	Leptin	1	1	1918.55	1280.28	4.00392	453.778
2019-02-05	8	Injection	86512	Saline	1	1	3851.22	2570	32.6987	1534.84
2019-02-05	8	Injection	86601	Leptin	1	2	28449.2	18984.7	1857.15	4378.95
2019-02-05	8	Injection	86510	Saline	2	1	108568	72449.8	10248	8211.37
2019-02-05	8	Injection	86604	Leptin	2	1	44620.5	29776.1	6216.75	15710
2019-02-05	8	Injection	86613	Saline	1	2	6032.58	4025.66	210.206	489.146
2019-02-05	8	Injection	86516	Leptin	2	1	227506	151819	19974.2	20648.2
2019-02-05	8	Injection	86690	Saline	1	2	94782.4	63250.2	9961.09	11945
2019-02-05	8	Injection	86611	Leptin	1	2	70725	47196.2	6330.2	10402.9
2019-02-05	8	Injection	86602	Saline	1	2	66433.4	44332.4	7953.79	13770.1
2019-02-05	8	Injection	86503	Leptin	1	2	13371.6	8923.13	976.289	3493.42
2019-02-05	8	Injection	86292	Saline	2	2	139259	92930.2	13760.8	15802.8
2019-02-05	8	Injection	86515	Saline	2	2	100689	67191.7	10066.5	14394.1
2019-02-05	8	Injection	88000	Leptin	2	1	3012	2009.96	144.141	768.085
2019-02-05	8	Injection	86519	Saline	1	1	82684.7	55177.1	5929.81	7259.11
2019-02-05	8	Injection	86612	Leptin	2	1	8625.12	5755.71	361.02	5231.12
2019-02-05	8	Injection	86508	Saline	1	1	138333	92312.2	12428.2	18364
2019-02-05	8	Injection	86513	Leptin	1	1	38555.7	25729	3522.78	11405.2
2019-02-05	8	Injection	86610	Leptin	1	2	57467.8	38349.4	5133.03	8689.84
2019-02-05	8	Injection	88163	Saline	2	1	11025	7357.18	371.697	10025.8
2019-02-05	8	Injection	86517	Leptin	2	1	4342.8	2898.04	282.276	379.038
2019-02-05	8	Injection	86504	Saline	2	2	11536.3	7698.42	437.762	2031.32
2019-02-05	8	Injection	86603	Leptin	2	1	4405.21	2939.69	112.777	990.303
2019-02-06	9	Injection	86518	Leptin	1	1	2742.18	1829.91	0	1959.25
2019-02-06	9	Injection	86512	Saline	1	1	2905.21	1938.7	81.413	401.059
2019-02-06	9	Injection	86601	Leptin	1	2	10949.3	7306.69	577.232	8696.51
2019-02-06	9	Injection	86510	Saline	2	1	43622.6	29110.2	4249.49	4465.71
2019-02-06	9	Injection	86604	Leptin	2	1	82769.3	55233.6	9382.52	12197.3
2019-02-06	9	Injection	86613	Saline	1	2	3628.48	2421.36	147.478	615.936
2019-02-06	9	Injection	86516	Leptin	2	1	181351	121019	15485.2	18426.7
2019-02-06	9	Injection	86690	Saline	1	2	151612	101174	14250.6	5993.87
2019-02-06	9	Injection	86611	Leptin	1	2	12699	8474.32	1006.32	3768.36
2019-02-06	9	Injection	86602	Saline	1	2	79255.3	52888.7	8663.15	11854.9
2019-02-06	9	Injection	86503	Leptin	1	2	17059	11383.8	1375.35	4457.7
2019-02-06	9	Injection	86292	Saline	2	2	125057	83453.3	12544.9	17330.3
2019-02-06	9	Injection	86515	Saline	2	2	50308	33571.5	8891.37	15015.4
2019-02-06	9	Injection	88000	Leptin	2	1	4663.97	3112.36	13.3464	6197.4
2019-02-06	9	Injection	86519	Saline	1	1	9620.58	6420.01	655.976	872.187
2019-02-06	9	Injection	86612	Leptin	2	1	7505.8	5008.77	288.95	4118.7
2019-02-06	9	Injection	86508	Saline	1	1	92997.5	62059.1	6635.16	17012
2019-02-06	9	Injection	86513	Leptin	1	1	27784.4	18541.1	1934.56	6856.71
2019-02-06	9	Injection	86610	Leptin	1	2	16765.1	11187.7	1301.27	1891.85
2019-02-06	9	Injection	88163	Saline	2	1	11587.4	7732.48	477.801	7678.85
2019-02-06	9	Injection	86517	Leptin	2	1	4853.58	3238.89	243.572	442.433
2019-02-06	9	Injection	86504	Saline	2	2	4108.22	2741.5	7.34052	1518.15
2019-02-06	9	Injection	86603	Leptin	2	1	2673.61	1784.16	12.6791	224.887
2019-02-07	10	Injection	86518	Leptin	1	1	4104.29	2738.88	21.3542	2463.08
2019-02-07	10	Injection	86512	Saline	1	1	3784.05	2525.17	46.7124	2149.44
2019-02-07	10	Injection	86601	Leptin	1	2	8756.02	5843.07	585.24	1979.27
2019-02-07	10	Injection	86510	Saline	2	1	41481.3	27681.3	4095.34	4748.65
2019-02-07	10	Injection	86604	Leptin	2	1	7233.49	4827.05	439.764	2781.39
2019-02-07	10	Injection	86613	Saline	1	2	2915.88	1945.83	130.795	441.099
2019-02-07	10	Injection	86516	Leptin	2	1	31015.9	20697.5	3204.47	6071.28
2019-02-07	10	Injection	86690	Saline	1	2	77524.7	51733.8	9169.64	7504.01
2019-02-07	10	Injection	86611	Leptin	1	2	2218.56	1480.49	86.7516	316.31
2019-02-07	10	Injection	86602	Saline	1	2	58158.7	38810.4	7190.37	13686.1
2019-02-07	10	Injection	86503	Leptin	1	2	39563.7	26401.6	4274.85	7369.21
2019-02-07	10	Injection	86292	Saline	2	2	124780	83268.1	13241	12685.1
2019-02-07	10	Injection	86515	Saline	2	2	42768	28539.9	4822.05	8445.6
2019-02-07	10	Injection	88000	Leptin	2	1	21139.4	14106.7	1105.75	13805.5
2019-02-07	10	Injection	86519	Saline	1	1	27780.3	18538.3	2244.2	2699.31
2019-02-07	10	Injection	86612	Leptin	2	1	9781.72	6527.54	405.063	8055.89
2019-02-07	10	Injection	86508	Saline	1	1	53562.2	35743.2	5780.99	5840.38
2019-02-07	10	Injection	86513	Leptin	1	1	39386.1	26283.1	3993.24	8895.38
2019-02-07	10	Injection	86610	Leptin	1	2	11074.4	7390.16	682.001	2714.66
2019-02-07	10	Injection	88163	Saline	2	1	6146.33	4101.57	334.995	1695.66
2019-02-07	10	Injection	86517	Leptin	2	1	4459.81	2976.12	252.247	520.51
2019-02-07	10	Injection	86504	Saline	2	2	3434.17	2291.69	22.6889	1181.16
2019-02-07	10	Injection	86603	Leptin	2	1	3127.83	2087.26	52.7183	606.594
2019-02-08	11	Injection	86518	Leptin	1	1	16564.3	11053.7	4.00392	15993
2019-02-08	11	Injection	86512	Saline	1	1	7844.49	5234.79	555.21	6186.72
2019-02-08	11	Injection	86601	Leptin	1	2	18831.3	12566.5	832.148	13126.9
2019-02-08	11	Injection	86510	Saline	2	1	53571.6	35749.4	4164.74	3055.66
2019-02-08	11	Injection	86604	Leptin	2	1	4479.64	2989.36	156.82	2533.15
2019-02-08	11	Injection	86613	Saline	1	2	3653.39	2437.98	137.468	594.582
2019-02-08	11	Injection	86516	Leptin	2	1	152822	101981	12462.2	13428.5
2019-02-08	11	Injection	86690	Saline	1	2	99074.3	66114.2	9968.43	4940.84
2019-02-08	11	Injection	86611	Leptin	1	2	45915.8	30640.5	2836.11	6806.66
2019-02-08	11	Injection	86602	Saline	1	2	69739.1	46538.3	8038.54	12559.6
2019-02-08	11	Injection	86503	Leptin	1	2	10188.2	6798.76	206.869	7030.88
2019-02-08	11	Injection	86292	Saline	2	2	72634.9	48470.7	5872.42	7575.42
2019-02-08	11	Injection	86515	Saline	2	2	47387.1	31622.4	6563.76	10195.3
2019-02-08	11	Injection	88000	Leptin	2	1	15545.2	10373.6	292.286	10016.5
2019-02-08	11	Injection	86519	Saline	1	1	2094.57	1397.75	23.3562	211.54
2019-02-08	11	Injection	86612	Leptin	2	1	3701.35	2469.99	77.4091	1123.77
2019-02-08	11	Injection	86508	Saline	1	1	6302.46	4205.76	236.899	3415.34
2019-02-08	11	Injection	86513	Leptin	1	1	8178.92	5457.96	198.861	4065.31
2019-02-08	11	Injection	86610	Leptin	1	2	12122	8089.28	463.787	11755.5
2019-02-08	11	Injection	88163	Saline	2	1	44351.3	29596.5	5080.31	5528.08
2019-02-08	11	Injection	86517	Leptin	2	1	3264.01	2178.14	134.799	193.523
2019-02-08	11	Injection	86504	Saline	2	2	3244.12	2164.86	10.0098	591.913
2019-02-08	11	Injection	86603	Leptin	2	1	2153.99	1437.4	54.7202	29.3621
2019-02-09	12	Injection	86518	Leptin	1	1	2827.13	1886.6	23.3562	1395.37
2019-02-09	12	Injection	86512	Saline	1	1	5107.75	3408.5	85.417	5126.35
2019-02-09	12	Injection	86601	Leptin	1	2	15687.6	10468.6	835.485	8234.06
2019-02-09	12	Injection	86510	Saline	2	1	19554	13048.8	1415.39	1434.07
2019-02-09	12	Injection	86604	Leptin	2	1	4304.57	2872.53	277.605	1050.36
2019-02-09	12	Injection	86613	Saline	1	2	6621.36	4418.56	303.631	960.941
2019-02-09	12	Injection	86516	Leptin	2	1	6811.65	4545.55	498.488	959.606
2019-02-09	12	Injection	86690	Saline	1	2	160878	107357	14414.8	5651.53
2019-02-09	12	Injection	86611	Leptin	1	2	26917.3	17962.4	2064.02	2750.69
2019-02-09	12	Injection	86602	Saline	1	2	61322.7	40921.9	5978.52	10846
2019-02-09	12	Injection	86503	Leptin	1	2	17322.6	11559.7	441.099	16271.3
2019-02-09	12	Injection	86292	Saline	2	2	90092.5	60120.5	10551.7	10277.4
2019-02-09	12	Injection	86515	Saline	2	2	132174	88202.3	5607.49	5006.23
2019-02-09	12	Injection	88000	Leptin	2	1	5525.61	3687.35	196.859	4719.29
2019-02-09	12	Injection	86519	Saline	1	1	2009.07	1340.7	14.0137	156.82
2019-02-09	12	Injection	86612	Leptin	2	1	7706.92	5142.98	304.965	4361.6
2019-02-09	12	Injection	86508	Saline	1	1	11942.2	7969.26	784.768	8307.47
2019-02-09	12	Injection	86513	Leptin	1	1	12712.6	8483.36	673.993	9339.81
2019-02-09	12	Injection	86610	Leptin	1	2	12137.7	8099.73	445.77	9650.11
2019-02-09	12	Injection	88163	Saline	2	1	3943.04	2631.27	74.0725	1454.09
2019-02-09	12	Injection	86517	Leptin	2	1	12590.4	8401.79	1432.74	1423.39
2019-02-09	12	Injection	86504	Saline	2	2	5771.86	3851.68	19.3523	4154.07
2019-02-09	12	Injection	86603	Leptin	2	1	4502.25	3004.44	34.7006	3226.49
2019-02-10	13	Injection	86518	Leptin	1	1	2366.17	1578.99	3.3366	573.895
2019-02-10	13	Injection	86512	Saline	1	1	11221.3	7488.2	90.0882	10350.1
2019-02-10	13	Injection	86601	Leptin	1	2	15893	10605.7	1306.61	4601.84
2019-02-10	13	Injection	86510	Saline	2	1	24996.7	16680.8	2178.8	2180.8
2019-02-10	13	Injection	86604	Leptin	2	1	3853.33	2571.4	263.591	762.747
2019-02-10	13	Injection	86613	Saline	1	2	3760.82	2509.67	222.885	679.332
2019-02-10	13	Injection	86516	Leptin	2	1	10344.2	6902.86	914.228	1528.83
2019-02-10	13	Injection	86690	Saline	1	2	85040.9	56749.5	10164.6	11292.4
2019-02-10	13	Injection	86611	Leptin	1	2	16845	11241	1662.29	2628.57
2019-02-10	13	Injection	86602	Saline	1	2	56733	37859.1	7122.31	13159.6
2019-02-10	13	Injection	86503	Leptin	1	2	8693.42	5801.29	306.967	4037.29
2019-02-10	13	Injection	86292	Saline	2	2	80035	53408.9	8481.64	10771.2
2019-02-10	13	Injection	86515	Saline	2	2	8849.51	5905.46	306.3	5650.2
2019-02-10	13	Injection	88000	Leptin	2	1	15099.7	10076.3	1245.22	11567.3
2019-02-10	13	Injection	86519	Saline	1	1	1375.22	917.715	2.66928	121.452
2019-02-10	13	Injection	86612	Leptin	2	1	10281.3	6860.92	315.642	7887.72
2019-02-10	13	Injection	86508	Saline	1	1	6902.19	4605.97	287.615	2976.91
2019-02-10	13	Injection	86513	Leptin	1	1	12351.3	8242.28	840.156	2862.14
2019-02-10	13	Injection	86610	Leptin	1	2	10795.7	7204.17	555.21	7088.27
2019-02-10	13	Injection	88163	Saline	2	1	12034	8030.55	797.447	2270.22
2019-02-10	13	Injection	86517	Leptin	2	1	4916.64	3280.97	147.478	1193.17
2019-02-10	13	Injection	86504	Saline	2	2	2581.53	1722.71	0	238.901
2019-02-10	13	Injection	86603	Leptin	2	1	4106.87	2740.6	62.7281	767.418
2019-02-11	14	Injection	86518	Leptin	1	1	1275.14	850.929	0	101.433
2019-02-11	14	Injection	86512	Saline	1	1	16806.8	11215.5	1159.8	6639.83
2019-02-11	14	Injection	86601	Leptin	1	2	165363	110350	12073.8	12392.8
2019-02-11	14	Injection	86510	Saline	2	1	33874.2	22604.9	2576.52	3111.05
2019-02-11	14	Injection	86604	Leptin	2	1	4006.48	2673.61	34.0333	1988.61
2019-02-11	14	Injection	86613	Saline	1	2	4581.36	3057.23	130.795	563.218
2019-02-11	14	Injection	86516	Leptin	2	1	6264.72	4180.57	390.382	1140.45
2019-02-11	14	Injection	86690	Saline	1	2	75476.9	50367.3	8767.92	10779.9
2019-02-11	14	Injection	86611	Leptin	1	2	40818.8	27239.2	3283.21	6731.26
2019-02-11	14	Injection	86602	Saline	1	2	61896	41304.4	6314.85	9498.63
2019-02-11	14	Injection	86503	Leptin	1	2	6960.47	4644.86	260.255	4627.2
2019-02-11	14	Injection	86292	Saline	2	2	61878.2	41292.6	6416.95	9594.73
2019-02-11	14	Injection	86515	Saline	2	2	41573.7	27743	2619.23	7009.53
2019-02-11	14	Injection	88000	Leptin	2	1	3906.2	2606.69	279.607	665.985
2019-02-11	14	Injection	86519	Saline	1	1	2016.94	1345.94	11.3444	207.537
2019-02-11	14	Injection	86612	Leptin	2	1	8596.41	5736.56	144.141	5512.06
2019-02-11	14	Injection	86508	Saline	1	1	12547.9	8373.47	976.956	4820.72
2019-02-11	14	Injection	86513	Leptin	1	1	8779.74	5858.89	444.435	1354.66
2019-02-11	14	Injection	86610	Leptin	1	2	10411.1	6947.51	475.799	7233.08
2019-02-11	14	Injection	88163	Saline	2	1	11363.3	7582.97	383.709	6368.9
2019-02-11	14	Injection	86517	Leptin	2	1	5617.39	3748.59	128.793	1982.61
2019-02-11	14	Injection	86504	Saline	2	2	2932.44	1956.87	160.157	470.461
2019-02-11	14	Injection	86603	Leptin	2	1	2977.83	1987.16	39.3719	813.463
2019-02-12	15	Post	86518	Leptin	1	1	19777.8	13198.1	1916.54	6856.71
2019-02-12	15	Post	86512	Saline	1	1	21911.7	14622.1	573.228	11972.4
2019-02-12	15	Post	86601	Leptin	1	2	18460	12318.8	1188.5	9920.38
2019-02-12	15	Post	86510	Saline	2	1	50063.8	33408.6	3468.06	5520.07
2019-02-12	15	Post	86604	Leptin	2	1	4619.93	3082.97	20.0196	2916.86
2019-02-12	15	Post	86613	Saline	1	2	2342.89	1563.46	80.0784	292.953
2019-02-12	15	Post	86516	Leptin	2	1	81826.1	54604.2	7652.16	12655.1
2019-02-12	15	Post	86690	Saline	1	2	78698.2	52516.9	7913.08	9947.74
2019-02-12	15	Post	86611	Leptin	1	2	50899.3	33966.1	4721.29	9692.82
2019-02-12	15	Post	86602	Saline	1	2	74563.1	49757.4	8186.01	14346.7
2019-02-12	15	Post	86503	Leptin	1	2	7614.79	5081.5	311.638	894.209
2019-02-12	15	Post	86292	Saline	2	2	80733.8	53875.3	7598.77	10739.8
2019-02-12	15	Post	86515	Saline	2	2	14524.2	9692.28	633.954	10890.7
2019-02-12	15	Post	88000	Leptin	2	1	5918.3	3949.4	178.842	752.07
2019-02-12	15	Post	86519	Saline	1	1	1299.62	867.264	0	30.0294
2019-02-12	15	Post	86612	Leptin	2	1	3433.04	2290.94	62.7281	909.557
2019-02-12	15	Post	86508	Saline	1	1	5458.4	3642.5	42.7085	1439.41
2019-02-12	15	Post	86513	Leptin	1	1	4627.84	3088.25	79.4111	580.568
2019-02-12	15	Post	86610	Leptin	1	2	4398.22	2935.02	148.812	1564.87
2019-02-12	15	Post	88163	Saline	2	1	7277.04	4856.11	315.642	2091.38
2019-02-12	15	Post	86517	Leptin	2	1	6567.9	4382.89	338.331	2407.02
2019-02-12	15	Post	86504	Saline	2	2	4595.74	3066.83	0	1506.14
2019-02-12	15	Post	86603	Leptin	2	1	3264.62	2178.54	177.507	110.775
2019-02-13	16	Post	86518	Leptin	1	1	6040.15	4030.71	46.0451	4605.84
2019-02-13	16	Post	86512	Saline	1	1	8063.77	5381.12	72.7379	8619.11
2019-02-13	16	Post	86601	Leptin	1	2	19858.7	13252.1	1503.47	1799.76
2019-02-13	16	Post	86510	Saline	2	1	8963.75	5981.69	436.427	2155.44
2019-02-13	16	Post	86604	Leptin	2	1	6680.42	4457.98	298.959	1940.57
2019-02-13	16	Post	86613	Saline	1	2	3406.5	2273.23	190.186	673.326
2019-02-13	16	Post	86516	Leptin	2	1	9148.87	6105.23	776.093	1787.75
2019-02-13	16	Post	86690	Saline	1	2	48173	32146.8	5807.69	7543.39
2019-02-13	16	Post	86611	Leptin	1	2	14874.4	9925.96	1434.07	2558.5
2019-02-13	16	Post	86602	Saline	1	2	49863.5	33274.9	5448.67	12357.4
2019-02-13	16	Post	86503	Leptin	1	2	3458.8	2308.13	125.456	531.187
2019-02-13	16	Post	86292	Saline	2	2	67788	45236.3	6846.04	8362.85
2019-02-13	16	Post	86515	Saline	2	2	3461.99	2310.25	160.824	1051.7
2019-02-13	16	Post	88000	Leptin	2	1	10334.1	6896.17	604.592	1117.09
2019-02-13	16	Post	86519	Saline	1	1	1582.81	1056.24	15.3484	189.519
2019-02-13	16	Post	86612	Leptin	2	1	4675.42	3120	34.7006	672.659
2019-02-13	16	Post	86508	Saline	1	1	4186.83	2793.96	213.542	836.819
2019-02-13	16	Post	86513	Leptin	1	1	5054.77	3373.15	230.893	375.701
2019-02-13	16	Post	86610	Leptin	1	2	8843.92	5901.73	547.87	2090.71
2019-02-13	16	Post	88163	Saline	2	1	5733.52	3826.09	132.797	758.076
2019-02-13	16	Post	86517	Leptin	2	1	13318.5	8887.69	10.0098	1599.57
2019-02-13	16	Post	86504	Saline	2	2	3349.58	2235.24	10.6771	884.199
2019-02-13	16	Post	86603	Leptin	2	1	4657.33	3107.93	47.3797	2017.31
2019-02-14	17	Post	86518	Leptin	1	1	3139.54	2095.08	24.6908	1520.82
2019-02-14	17	Post	86512	Saline	1	1	5114.25	3412.84	173.503	2818.76
2019-02-14	17	Post	86601	Leptin	1	2	9961.24	6647.34	563.885	3242.51
2019-02-14	17	Post	86510	Saline	2	1	142315	94969.6	12103.9	13009.4
2019-02-14	17	Post	86604	Leptin	2	1	14231.3	9496.83	1188.5	6733.26
2019-02-14	17	Post	86613	Saline	1	2	5438.77	3629.4	414.406	744.062
2019-02-14	17	Post	86516	Leptin	2	1	8338.46	5564.42	461.785	6862.05
2019-02-14	17	Post	86690	Saline	1	2	84957.9	56694.1	9859.65	10342.1
2019-02-14	17	Post	86611	Leptin	1	2	14138.2	9434.7	1163.14	3962.55
2019-02-14	17	Post	86602	Saline	1	2	37414.6	24967.5	4257.5	9621.42
2019-02-14	17	Post	86503	Leptin	1	2	6089	4063.31	298.959	1419.39
2019-02-14	17	Post	86292	Saline	2	2	86326.6	57607.5	8751.23	11110.2
2019-02-14	17	Post	86515	Saline	2	2	6500.66	4338.02	357.016	2686.63
2019-02-14	17	Post	88000	Leptin	2	1	4160.53	2776.4	203.533	511.834
2019-02-14	17	Post	86519	Saline	1	1	1558.22	1039.83	10.6771	218.881
2019-02-14	17	Post	86612	Leptin	2	1	7698.59	5137.42	255.584	2332.95
2019-02-14	17	Post	86508	Saline	1	1	7841.46	5232.77	550.539	1002.31
2019-02-14	17	Post	86513	Leptin	1	1	6488.37	4329.82	284.946	416.408
2019-02-14	17	Post	86610	Leptin	1	2	8998.93	6005.16	673.993	992.305
2019-02-14	17	Post	88163	Saline	2	1	6047.95	4035.92	350.343	1002.98
2019-02-14	17	Post	86517	Leptin	2	1	2806.12	1872.58	15.3484	85.417
2019-02-14	17	Post	86504	Saline	2	2	2786.75	1859.65	54.0529	513.169
2019-02-14	17	Post	86603	Leptin	2	1	3363.08	2244.25	40.7065	385.044
2019-02-15	18	Post	86518	Leptin	1	1	4077.88	2721.25	47.3797	2300.92
2019-02-15	18	Post	86512	Saline	1	1	5159.11	3442.78	57.3895	4869.43
2019-02-15	18	Post	86601	Leptin	1	2	36792.5	24552.3	3978.56	7394.57
2019-02-15	18	Post	86510	Saline	2	1	53269.6	35547.9	5161.72	10564.3
2019-02-15	18	Post	86604	Leptin	2	1	8287.11	5530.15	548.537	3857.11
2019-02-15	18	Post	86613	Saline	1	2	3676.8	2453.6	181.511	549.872
2019-02-15	18	Post	86516	Leptin	2	1	54615	36445.7	6086.63	8882.03
2019-02-15	18	Post	86690	Saline	1	2	90374.9	60309	9763.56	9642.11
2019-02-15	18	Post	86611	Leptin	1	2	3195.55	2132.45	79.4111	425.75
2019-02-15	18	Post	86602	Saline	1	2	25907.3	17288.4	2866.14	6546.41
2019-02-15	18	Post	86503	Leptin	1	2	4607.83	3074.9	172.836	1069.71
2019-02-15	18	Post	86292	Saline	2	2	65386.2	43633.5	6527.72	9972.43
2019-02-15	18	Post	86515	Saline	2	2	33492.9	22350.5	3637.56	7157.67
2019-02-15	18	Post	88000	Leptin	2	1	4830.59	3223.55	240.235	509.832
2019-02-15	18	Post	86519	Saline	1	1	1652.33	1102.63	24.6908	102.1
2019-02-15	18	Post	86612	Leptin	2	1	4491.34	2997.16	32.6987	1300.61
2019-02-15	18	Post	86508	Saline	1	1	7997.3	5336.76	611.932	1628.93
2019-02-15	18	Post	86513	Leptin	1	1	34102.1	22757	3514.11	11979.7
2019-02-15	18	Post	86610	Leptin	1	2	7254.88	4841.32	257.586	3139.74
2019-02-15	18	Post	88163	Saline	2	1	10681.5	7128	681.334	2132.09
2019-02-15	18	Post	86504	Saline	2	2	3742.29	2497.31	54.7202	972.285
2019-02-15	18	Post	86603	Leptin	2	1	5831.21	3891.28	381.04	190.854
2019-02-16	19	Post	86518	Leptin	1	1	28274.1	18867.9	3025.63	8020.52
2019-02-16	19	Post	86512	Saline	1	1	8059.02	5377.94	211.54	4605.18
2019-02-16	19	Post	86601	Leptin	1	2	13737.3	9167.16	1212.52	3303.23
2019-02-16	19	Post	86510	Saline	2	1	8570.87	5719.51	328.321	3186.45
2019-02-16	19	Post	86604	Leptin	2	1	7243.59	4833.8	288.95	3185.79
2019-02-16	19	Post	86613	Saline	1	2	4353.56	2905.22	226.221	653.974
2019-02-16	19	Post	86516	Leptin	2	1	47048.5	31396.4	5611.49	6831.35
2019-02-16	19	Post	86690	Saline	1	2	92132.1	61481.6	11084.2	12498.2
2019-02-16	19	Post	86611	Leptin	1	2	3454.26	2305.09	59.3915	1954.58
2019-02-16	19	Post	86602	Saline	1	2	45430.9	30317	5132.36	10948.7
2019-02-16	19	Post	86503	Leptin	1	2	5167.22	3448.19	166.83	1662.96
2019-02-16	19	Post	86292	Saline	2	2	64369.9	42955.3	6426.96	8465.62
2019-02-16	19	Post	86515	Saline	2	2	11161	7447.94	780.764	4161.41
2019-02-16	19	Post	88000	Leptin	2	1	41886.4	27951.6	2952.22	5387.94
2019-02-16	19	Post	86519	Saline	1	1	2239.76	1494.64	9.34248	904.219
2019-02-16	19	Post	86612	Leptin	2	1	6943.82	4633.75	174.838	3488.75
2019-02-16	19	Post	86508	Saline	1	1	6943.49	4633.53	315.642	3516.78
2019-02-16	19	Post	86513	Leptin	1	1	18057.8	12050.3	1839.8	1510.15
2019-02-16	19	Post	86610	Leptin	1	2	5103.4	3405.6	39.3719	2432.38
2019-02-16	19	Post	88163	Saline	2	1	4369.57	2915.9	126.123	844.827
2019-02-16	19	Post	86504	Saline	2	2	5975.32	3987.45	58.7242	3313.24
2019-02-16	19	Post	86603	Leptin	2	1	4080.44	2722.96	49.3817	869.518
2019-02-17	20	Post	86518	Leptin	1	1	8358.78	5577.98	515.838	2899.51
2019-02-17	20	Post	86512	Saline	1	1	5549.68	3703.41	139.47	6053.93
2019-02-17	20	Post	86601	Leptin	1	2	26643.5	17779.7	2569.18	7056.24
2019-02-17	20	Post	86510	Saline	2	1	65761.1	43883.7	6130.67	13680.1
2019-02-17	20	Post	86604	Leptin	2	1	9444.88	6302.75	481.138	3599.52
2019-02-17	20	Post	86613	Saline	1	2	5305.38	3540.39	361.02	940.254
2019-02-17	20	Post	86516	Leptin	2	1	63259.3	42214.2	6843.37	12619
2019-02-17	20	Post	86690	Saline	1	2	79674.4	53168.3	9183.66	9380.52
2019-02-17	20	Post	86611	Leptin	1	2	2983.43	1990.9	82.7477	282.276
2019-02-17	20	Post	86602	Saline	1	2	55388.2	36961.7	6405.6	13638
2019-02-17	20	Post	86503	Leptin	1	2	6812.56	4546.16	333.66	2328.28
2019-02-17	20	Post	86292	Saline	2	2	61341.4	40934.4	6176.05	8332.16
2019-02-17	20	Post	86515	Saline	2	2	10181.7	6794.44	579.901	4224.14
2019-02-17	20	Post	88000	Leptin	2	1	6977.78	4656.41	294.955	1239.21
2019-02-17	20	Post	86519	Saline	1	1	2327.19	1552.98	36.7026	69.4013
2019-02-17	20	Post	86612	Leptin	2	1	9422.34	6287.72	439.764	3345.28
2019-02-17	20	Post	86508	Saline	1	1	3857.32	2574.06	185.515	535.858
2019-02-17	20	Post	86513	Leptin	1	1	58804.5	39241.4	6360.23	16775.8
2019-02-17	20	Post	86610	Leptin	1	2	6596.13	4401.73	147.478	2722
2019-02-17	20	Post	88163	Saline	2	1	16263.6	10853	1502.8	3060.33
2019-02-17	20	Post	86504	Saline	2	2	3288.72	2194.63	104.102	744.729
2019-02-17	20	Post	86603	Leptin	2	1	5442.63	3631.98	166.163	535.858
2019-02-18	21	Post	86518	Leptin	1	1	25634.5	17106.4	2431.05	5209.1
2019-02-18	21	Post	86512	Saline	1	1	5857.63	3908.92	263.591	1556.86
2019-02-18	21	Post	86601	Leptin	1	2	30025.4	20036.6	2740.68	9733.53
2019-02-18	21	Post	86510	Saline	2	1	99527.1	66416.4	9857.65	11752.8
2019-02-18	21	Post	86604	Leptin	2	1	12154.8	8111.14	894.876	4445.69
2019-02-18	21	Post	86613	Saline	1	2	7587.88	5063.54	477.134	1297.27
2019-02-18	21	Post	86516	Leptin	2	1	95742.8	63891.1	8870.02	10701.1
2019-02-18	21	Post	86690	Saline	1	2	13065.3	8718.72	994.307	2785.39
2019-02-18	21	Post	86611	Leptin	1	2	3761.71	2510.26	39.3719	3261.86
2019-02-18	21	Post	86602	Saline	1	2	56636.1	37794.4	6105.31	12036.5
2019-02-18	21	Post	86503	Leptin	1	2	4267.82	2848	147.478	1099.74
2019-02-18	21	Post	86292	Saline	2	2	67762.3	45219.1	4782.02	8888.7
2019-02-18	21	Post	86515	Saline	2	2	74268.5	49560.9	7188.37	11578.7
2019-02-18	21	Post	88000	Leptin	2	1	218568	145855	12761.8	9030.17
2019-02-18	21	Post	86519	Saline	1	1	2001.94	1335.93	0	603.257
2019-02-18	21	Post	86612	Leptin	2	1	76952.9	51352.2	5664.21	9315.79
2019-02-18	21	Post	86508	Saline	1	1	11709	7813.62	1031.01	3215.15
2019-02-18	21	Post	86513	Leptin	1	1	58315.1	38914.8	6190.06	13636
2019-02-18	21	Post	86610	Leptin	1	2	12320.9	8221.97	790.107	6089.96
2019-02-18	21	Post	88163	Saline	2	1	4765.78	3180.3	196.859	926.24
2019-02-18	21	Post	86504	Saline	2	2	4335.14	2892.92	132.129	1540.84
2019-02-18	21	Post	86603	Leptin	2	1	6431.75	4292.03	172.169	3147.08

## Sheet: Body Fat
Bird	Treatment	Time	Fat (g)	logFat		Bird	Treatment	Time	Fat (g)	logFat
86612	leptin	24-01-2018	1.63	0.212188		86612	leptin	19-02-2018	6.07	0.783189
86516	leptin	24-01-2018	9.28	0.967548		86516	leptin	19-02-2018	8.21	0.914343
86518	leptin	24-01-2018	2.68	0.428135		86518	leptin	19-02-2018	3.3	0.518514
86601	leptin	24-01-2018	7.68	0.885361		86601	leptin	19-02-2018	6.56	0.816904
86503	leptin	24-01-2018	5.11	0.708421		86503	leptin	19-02-2018	7.08	0.850033
86611	leptin	24-01-2018	5.18	0.71433		86611	leptin	19-02-2018	6.47	0.810904
86604	leptin	24-01-2018	4.6	0.662758		86604	leptin	19-02-2018	3.33	0.522444
86603	leptin	24-01-2018	4.13	0.61595		86603	leptin	19-02-2018	2.12	0.326336
86513	leptin	24-01-2018	8.05	0.905796		86513	leptin	19-02-2018	8.86	0.947434
86610	leptin	24-01-2018	5.75	0.759668		86610	leptin	19-02-2018	9.84	0.992995
88000	leptin	24-01-2018	10.11	1.00475		88000	leptin	19-02-2018	8.17	0.912222
86690	saline	24-01-2018	2.25	0.352183		86690	saline	19-02-2018	1.33	0.123852
88163	saline	24-01-2018	2.29	0.359835		88163	saline	19-02-2018	2.92	0.465383
86519	saline	24-01-2018	8.56	0.932474		86519	saline	19-02-2018	5.75	0.759668
86512	saline	24-01-2018	4.54	0.657056		86512	saline	19-02-2018	5.08	0.705864
86510	saline	24-01-2018	3.67	0.564666		86510	saline	19-02-2018	5.84	0.766413
86292	saline	24-01-2018	4.99	0.698101		86292	saline	19-02-2018	3.61	0.557507
86602	saline	24-01-2018	10.01	1.00043		86602	saline	19-02-2018	8.23	0.9154
86613	saline	24-01-2018	2.57	0.409933		86613	saline	19-02-2018	1.6	0.20412
86504	saline	24-01-2018	4.12	0.614897		86504	saline	19-02-2018	3.18	0.502427
86508	saline	24-01-2018	5.6	0.748188		86508	saline	19-02-2018	1.83	0.262451
86515	saline	24-01-2018	8.1	0.908485		86515	saline	19-02-2018	7.87	0.895975
