# Supplementary material for: Leptin administration does not influence migratory behaviour in white-throated sparrows (Zonotrichia albicollis)
Source: PeerJ. 2022 Jun 15;10:e13584. doi: 10.7717/peerj.13584 (PMC9206435; doi:10.7717/peerj.13584)
Supplement: Supplemental Information 2 [file peerj-10-13584-s002.xlsx]

## Sheet: Sheet1
Variable	Type	# of variables	Interpretation
Date	Date	n/a
Trial	Numerical	21	Experimental day 1 is attributed to January 29, day 2 to january 30...day 21 to february 18th
Phase	Categorical	2	Injection is experimental phase with injections, recovery is experimental phase after cessation of injections
Bird_ID	Categorical	24	Banded bird ID
Treatment	Categorical	2
Sex	Categorical	2	Female = 1, Male = 2
Morph	Categorical	2	White morph = 1, tan morph = 2
Velocity_total	Numerical	n/a
Distance_total	Numerical	n/a
Movement_s	Numerical	n/a
Mobile_s	Numerical	n/a
